# Supplementary material for: Pragmatic Considerations When Extracting DNA for Metagenomics Analyses of Clinical Samples
Source: MDPI journal article supplement (doi:10.3390/ijms241411262), 2023-07-09
Supplement: s1 [file s1]

## Supplementary Information

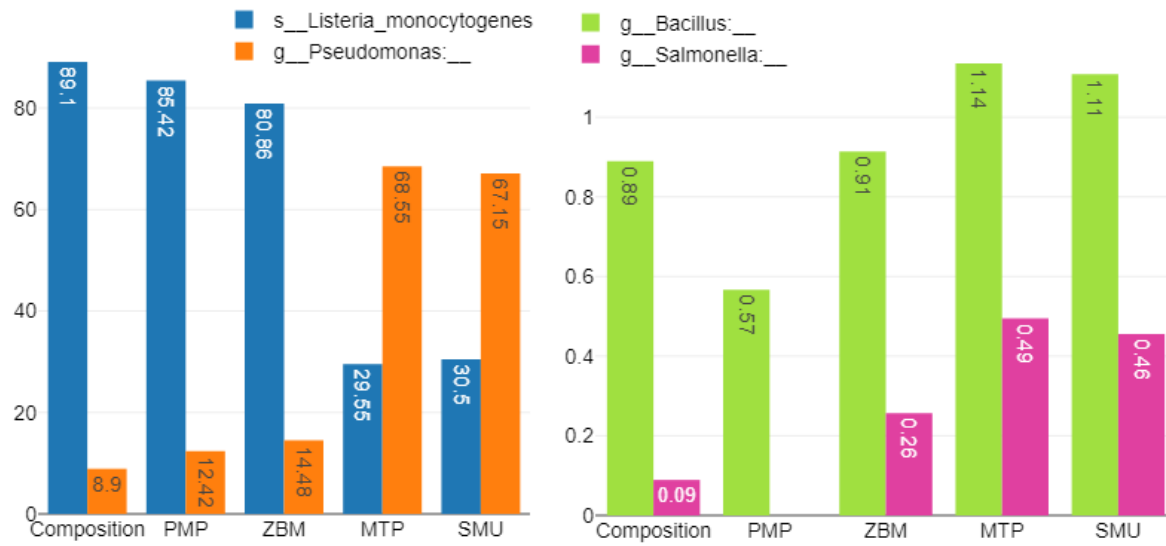

Figure S1. The sequencing results of the positive control highlight a crucial distinction between the extraction protocols: the automated ones struggle to consistently detect Gram-positive pathogens with resilient cell walls, most likely due to the significantly reduced bead-beating intensity. On the y-axis: relative prevalence.
